# Supplementary material for: Efficacy and safety of stem cell therapy in cerebral palsy: A systematic review and meta-analysis
Source: Front Bioeng Biotechnol. 2022 Dec 14;10:1006845. doi: 10.3389/fbioe.2022.1006845 (PMC9794999; doi:10.3389/fbioe.2022.1006845)
Supplement: Supplementary file 1 [file Table2.XLS]

## Sheet: PubMedSearchHistory
Supplementary Table 1.search strategies
Search number	Query	Sort By	Filters	Search Details	Results	Time
8	(("Cerebral Palsy"[Mesh]) OR (((((((((((((((((((((((((((((((((((((((((((((((CP (Cerebral Palsy)[Title/Abstract]) ) OR (Cerebral Palsy, Dystonic-Rigid[Title/Abstract])) OR (Cerebral Palsies, Dystonic-Rigid[Title/Abstract])) OR (Cerebral Palsy, Dystonic Rigid[Title/Abstract])) OR (Dystonic-Rigid Cerebral Palsies[Title/Abstract])) OR (Dystonic-Rigid Cerebral Palsy[Title/Abstract])) OR (Cerebral Pals…			("Cerebral Palsy"[MeSH Terms] OR ((("cogn process"[Journal] OR "cp"[All Fields]) AND ("Cerebral Palsy"[MeSH Terms] OR ("Cerebral"[All Fields] AND "Palsy"[All Fields]) OR "Cerebral Palsy"[All Fields])) OR (("Cerebral Palsy"[MeSH Terms] OR ("Cerebral"[All Fields] AND "Palsy"[All Fields]) OR "Cerebral Palsy"[All Fields]) AND "Dystonic-Rigid"[Title/Abstract]) OR ((("cerebrally"[All Fields] OR "cerebr…	107	1899-12-31 22:39:18
7	("Stem Cells"[Mesh]) OR (((((((((((((((Cell, Stem[Title/Abstract]) OR (Cells, Stem[Title/Abstract])) OR (Stem Cell[Title/Abstract])) OR (Progenitor Cells[Title/Abstract])) OR (Cell, Progenitor[Title/Abstract])) OR (Cells, Progenitor[Title/Abstract])) OR (Progenitor Cell[Title/Abstract])) OR (Mother Cells[Title/Abstract])) OR (Cell, Mother[Title/Abstract])) OR (Cells, Mother[Title/Abstract])) OR (…			"Stem Cells"[MeSH Terms] OR "cell stem"[Title/Abstract] OR "cells stem"[Title/Abstract] OR "stem cell"[Title/Abstract] OR "progenitor cells"[Title/Abstract] OR "cell progenitor"[Title/Abstract] OR "cells progenitor"[Title/Abstract] OR "progenitor cell"[Title/Abstract] OR "mother cells"[Title/Abstract] OR "cell mother"[Title/Abstract] OR "cells mother"[Title/Abstract] OR "mother cell"[Title/Abstra…	386936	1899-12-31 22:38:38
6	("Cerebral Palsy"[Mesh]) OR (((((((((((((((((((((((((((((((((((((((((((((((CP (Cerebral Palsy)[Title/Abstract]) ) OR (Cerebral Palsy, Dystonic-Rigid[Title/Abstract])) OR (Cerebral Palsies, Dystonic-Rigid[Title/Abstract])) OR (Cerebral Palsy, Dystonic Rigid[Title/Abstract])) OR (Dystonic-Rigid Cerebral Palsies[Title/Abstract])) OR (Dystonic-Rigid Cerebral Palsy[Title/Abstract])) OR (Cerebral Palsy…			"Cerebral Palsy"[MeSH Terms] OR ((("cogn process"[Journal] OR "cp"[All Fields]) AND ("Cerebral Palsy"[MeSH Terms] OR ("Cerebral"[All Fields] AND "Palsy"[All Fields]) OR "Cerebral Palsy"[All Fields])) OR (("Cerebral Palsy"[MeSH Terms] OR ("Cerebral"[All Fields] AND "Palsy"[All Fields]) OR "Cerebral Palsy"[All Fields]) AND "Dystonic-Rigid"[Title/Abstract]) OR ((("cerebrally"[All Fields] OR "cerebru…	24576	1899-12-31 22:38:13
5	((((((((((((((Cell, Stem[Title/Abstract]) OR (Cells, Stem[Title/Abstract])) OR (Stem Cell[Title/Abstract])) OR (Progenitor Cells[Title/Abstract])) OR (Cell, Progenitor[Title/Abstract])) OR (Cells, Progenitor[Title/Abstract])) OR (Progenitor Cell[Title/Abstract])) OR (Mother Cells[Title/Abstract])) OR (Cell, Mother[Title/Abstract])) OR (Cells, Mother[Title/Abstract])) OR (Mother Cell[Title/Abstrac…			"cell stem"[Title/Abstract] OR "cells stem"[Title/Abstract] OR "stem cell"[Title/Abstract] OR "progenitor cells"[Title/Abstract] OR "cell progenitor"[Title/Abstract] OR "cells progenitor"[Title/Abstract] OR "progenitor cell"[Title/Abstract] OR "mother cells"[Title/Abstract] OR "cell mother"[Title/Abstract] OR "cells mother"[Title/Abstract] OR "mother cell"[Title/Abstract] OR "colony forming unit"…	256277	1899-12-31 22:35:31
4	"Stem Cells"[Mesh]	Most Recent		"Stem Cells"[MeSH Terms]	240140	1899-12-31 22:32:54
3	((((((((((((((((((((((((((((((((((((((((((((((CP (Cerebral Palsy)[Title/Abstract]) ) OR (Cerebral Palsy, Dystonic-Rigid[Title/Abstract])) OR (Cerebral Palsies, Dystonic-Rigid[Title/Abstract])) OR (Cerebral Palsy, Dystonic Rigid[Title/Abstract])) OR (Dystonic-Rigid Cerebral Palsies[Title/Abstract])) OR (Dystonic-Rigid Cerebral Palsy[Title/Abstract])) OR (Cerebral Palsy, Mixed[Title/Abstract])) OR …			(("cogn process"[Journal] OR "cp"[All Fields]) AND ("cerebral palsy"[MeSH Terms] OR ("Cerebral"[All Fields] AND "Palsy"[All Fields]) OR "cerebral palsy"[All Fields])) OR (("cerebral palsy"[MeSH Terms] OR ("Cerebral"[All Fields] AND "Palsy"[All Fields]) OR "cerebral palsy"[All Fields]) AND "Dystonic-Rigid"[Title/Abstract]) OR ((("cerebrally"[All Fields] OR "cerebrum"[MeSH Terms] OR "cerebrum"[All …	10630	1899-12-31 22:30:45
2	"Cerebral Palsy"[Mesh]	Most Recent		"Cerebral Palsy"[MeSH Terms]	22210	1899-12-31 22:21:17
