# Supplementary material for: Efficacy and safety of stem cell therapy in cerebral palsy: A systematic review and meta-analysis
Source: Front Bioeng Biotechnol. 2022 Dec 14;10:1006845. doi: 10.3389/fbioe.2022.1006845 (PMC9794999; doi:10.3389/fbioe.2022.1006845)
Supplement: Supplementary file 4 [file Table3.XLS]

## Sheet: SHEET 1
Supplementary Table 2. Clinical trials of cochrane's registered stem cell treatment for CP
Year	Author(s)	Title	Cell types	Volume	URL
2010	ChiCTR-ONRC-10000928,	Effect of Bone Marrow Mesenchymal Stem Cell on GMFM Scores of Children with Cerebral Palsy in Clinical Trial	BMSC		https://www.cochranelibrary.com/central/doi/10.1002/central/CN-01868718/full
2010	NCT01193660,	Allogenic Umbilical Cord Blood and Erythropoietin Combination Therapy for Cerebral Palsy	UCB		https://www.cochranelibrary.com/central/doi/10.1002/central/CN-01531314/full
2011	ChiCTR-ONRC-11001679,	Effect of Neural Stem Cells Derived From Autologous Bone Marrow Mesenchymal Stem Cell on Children with Cerebral Palsy in Clinical Trial	NSC-BMSC		https://www.cochranelibrary.com/central/doi/10.1002/central/CN-01805431/full
2011	NCT01486732,	FLT-PET Activity Change After Allogeneic Umbilical Cord Blood (UCB) Therapy in Cerebral Palsy	UCB		https://www.cochranelibrary.com/central/doi/10.1002/central/CN-01534297/full
2012	NCT01763255,	Multiple Transplantation of Bone Marrow Derived CD133 Cell in Cerebral Palsy	CD133+BMC		https://www.cochranelibrary.com/central/doi/10.1002/central/CN-01578865/full
2013	NCT01929434,	Efficacy of Stem Cell Transplantation Compared to Rehabilitation Treatment of Patients With Cerebral Paralysis	UCMSC		https://www.cochranelibrary.com/central/doi/10.1002/central/CN-01489761/full
2013	NCT01988584,	Safety and Effectiveness of Banked Cord Blood or Bone Morrow Stem Cells in Children With Cerebral Palsy (CP)	BMSC		https://www.cochranelibrary.com/central/doi/10.1002/central/CN-01479127/full
2014	NCT02231242,	Intrathecal Stem Cells for Cerebral Palsy Phase II	BMTNC		https://www.cochranelibrary.com/central/doi/10.1002/central/CN-01548456/full
2015	Zali, A; Arab, L; Ashrafi, F; Mardpour, S; Niknejhadi, M; Hedayati-Asl, AA; Halimi-Asl, A; Ommi, D; Hosseini, S-E; Baharvand, H; Aghdami, N	Intrathecal injection of CD133-positive enriched bone marrow progenitor cells in children with cerebral palsy: feasibility and safety	CD33+BMPC	17	https://www.cochranelibrary.com/central/doi/10.1002/central/CN-01052969/full
2015	Kang, M; Min, K; Jang, J; Kim, SC; Kang, MS; Jang, SJ; Lee, JY; Kim, SH; Kim, MK; An, SA; Kim, M	Involvement of Immune Responses in the Efficacy of Cord Blood Cell Therapy for Cerebral Palsy	UCB	24	https://www.cochranelibrary.com/central/doi/10.1002/central/CN-01258279/full
2015	Lee, YH; Rah, WJ; Moon, JH; Koh, H; Kang, HR; Eom, HJ; Lee, YJ; Kim, JY; Choi, YY; Park, K; Kim, MJ	Neuroregenerative potential of intravenous infusion of G-CSF followed by mobilized peripheral blood mononuclear cells in children with cerebral palsy	PBSC	100	https://www.cochranelibrary.com/central/doi/10.1002/central/CN-01108152/full
2016	Sun, J; Mikati, M; Troy, J; Gustafson, K; Goldstein, R; Mclaughlin, C; Case, L; Worley, G; Kurtzberg, J	Autologous cord blood infusion for the treatment of brain injury in children with cerebral palsy	UCB	58	https://www.cochranelibrary.com/central/doi/10.1002/central/CN-01361345/full
2016	NCT03005249,	Neural Stem Cells Therapy for Cerebral Palsy	NSC		https://www.cochranelibrary.com/central/doi/10.1002/central/CN-01585977/full
2016	Sun, J; Mikati, M; Worley, G; Case, L; Gustafson, K; Mclaughlin, C; Simmons, R; Song, A; Troy, J; Kurtzberg, J	A randomized trial of autologous umbilical cord blood infusion in children with cerebral palsy	UCB	58	https://www.cochranelibrary.com/central/doi/10.1002/central/CN-01334122/full
2017	Liu, X; Fu, X; Dai, G; Wang, X; Zhang, Z; Cheng, H; Zheng, P; An, Y	Comparative analysis of curative effect of bone marrow mesenchymal stem cell and bone marrow mononuclear cell transplantation for spastic cerebral palsy	BMSC, BMMC	15	https://www.cochranelibrary.com/central/doi/10.1002/central/CN-01424491/full
2017	IRCT201706176907N13,	effectes of umblical blood stem cells injection in the treatment of children with cerebral palsy	UBHSC, UCMSC		https://www.cochranelibrary.com/central/doi/10.1002/central/CN-01894114/full
2017	Rah, WJ; Lee, YH; Moon, JH; Jun, HJ; Kang, HR; Koh, H; Eom, HJ; Lee, JY; Lee, YJ; Kim, JY; Choi, YY; Park, K; Kim, MJ; Kim, SH	Neuroregenerative potential of intravenous G-CSF and autologous peripheral blood stem cells in children with cerebral palsy: a randomized, double-blind, cross-over study	PBSC	15	https://www.cochranelibrary.com/central/doi/10.1002/central/CN-01424550/full
2017	Sun, JM; Song, AW; Case, LE; Mikati, MA; Gustafson, KE; Simmons, R; Goldstein, R; Petry, J; McLaughlin, C; Waters-Pick, B; Chen, LW; Wease, S; Blackwell, B; Worley, G; Troy, J; Kurtzberg, J	Effect of Autologous Cord Blood Infusion on Motor Function and Brain Connectivity in Young Children with Cerebral Palsy: a Randomized, Placebo-Controlled Trial	UCB	6	https://www.cochranelibrary.com/central/doi/10.1002/central/CN-01431619/full
2018	Dai, G-H; Liu, X-B; Zhang, Z; Cheng, H-B; Wang, X-D; An, Y-H	Bone marrow mesenchymal stem cells versus bone marrow mononuclear cells for treating cerebral palsy	BMSC	22	https://www.cochranelibrary.com/central/doi/10.1002/central/CN-01572644/full
2018	Huang, L; Zhang, C; Gu, J; Wu, W; Shen, Z; Zhou, X; Lu, H	A Randomized, Placebo-Controlled Trial of Human Umbilical Cord Blood Mesenchymal Stem Cell Infusion for Children With Cerebral Palsy	UCMSC	27	https://www.cochranelibrary.com/central/doi/10.1002/central/CN-01708269/full
2018	ChiCTR1800016554,	Clinical research on treatment of cerebral palsy in children by umbilical cord mesenchyme stem cells	UCMSC		https://www.cochranelibrary.com/central/doi/10.1002/central/CN-01909019/full
2019	NCT03795974,	Efficacy of Allogeneic Umbilical Cord Derived Hematopoietic and Mesenchymal Stem Cells in Cerebral Palsy	UCHSC, UCMSC		https://www.cochranelibrary.com/central/doi/10.1002/central/CN-01965204/full
2020	IRCT20110628006907N14,	Effects of umbilical cord derived mesenchymal stem cells injection in the treatment of children with cerebral palsy	UCMSC		https://www.cochranelibrary.com/central/doi/10.1002/central/CN-02169969/full
2020	Gu, J; Huang, L; Zhang, C; Wang, Y; Zhang, R; Tu, Z; Wang, H; Zhou, X; Xiao, Z; Liu, Z; Hu, X; Ke, Z; Wang, D; Liu, L	Therapeutic evidence of umbilical cord-derived mesenchymal stem cell transplantation for cerebral palsy: a randomized, controlled trial	UCMSC	11	https://www.cochranelibrary.com/central/doi/10.1002/central/CN-02086977/full
2020	NCT04314687,	Stem Cell and Conditioned Medium for Cerebral Palsy	UCMSC		https://www.cochranelibrary.com/central/doi/10.1002/central/CN-02089208/full
2021	Amanat, M; Majmaa, A; Zarrabi, M; Nouri, M; Akbari, MG; Moaiedi, AR; Ghaemi, O; Zamani, F; Najafi, S; Badv, RS; Vosough, M; Hamidieh, AA; Salehi, M; Montazerlotfelahi, H; Tavasoli, AR; Heidari, M; Mohebi, H; Fatemi, A; Garakani, A; Ashrafi, MR	Clinical and imaging outcomes after intrathecal injection of umbilical cord tissue mesenchymal stem cells in cerebral palsy: a randomized double-blind sham-controlled clinical trial	UCMSC	12	https://www.cochranelibrary.com/central/doi/10.1002/central/CN-02301137/full
2021	IRCT20200502047277N5,	Investigation of the Effect of Stem Cells Injection in Children with Cerebral Palsy	BMSC		https://www.cochranelibrary.com/central/doi/10.1002/central/CN-02237991/full
2021	Zhang, L; Ellor, S; Sun, JM; Liu, C; Kurtzburg, J; Song, AW	DTI Tract-Based Quantitative Susceptibility Mapping: an Initial Feasibility Study to Investigate the Potential Role of Myelination in Brain Connectivity Change in Cerebral Palsy Patients During Autologous Cord Blood Cell Therapy Using a Rotationally-Invariant Quantitative Measure	UCB	53	https://www.cochranelibrary.com/central/doi/10.1002/central/CN-02144623/full
UCHSC, Umbilical Cord Derived Hematopoietic Stem Cells; UCMSC, Mesenchymal Stem Cells; BMSC, bone marrow mesenchymal stem cell; BMMC, bone marrow mononuclear cell; CD33+BMPC, CD133-positive enriched bone marrow progenitor cells; UBSC, umblical blood stem cells; UCB, umblical cord blood; UBHSC, umblical blood hematopoietic stem cells; NSC, Neural Stem Cells; BMTNC, bone marrow total nucleated cell…
